# Supplementary material for: Investigation of thermal, structural and dynamical properties of (Aux–Cuy–Niy)N=32,108,256ternary nanosystems: effect of Au addition to Cu–Ni bimetallic nanoclusters via MD simulation
Source: Royal Society of Chemistry journal article supplement (doi:10.1039/c6ra13057g), 2016-01-01
Supplement: c6ra13057g1.pdf [file c6ra13057g1.pdf]

## Supporting information:

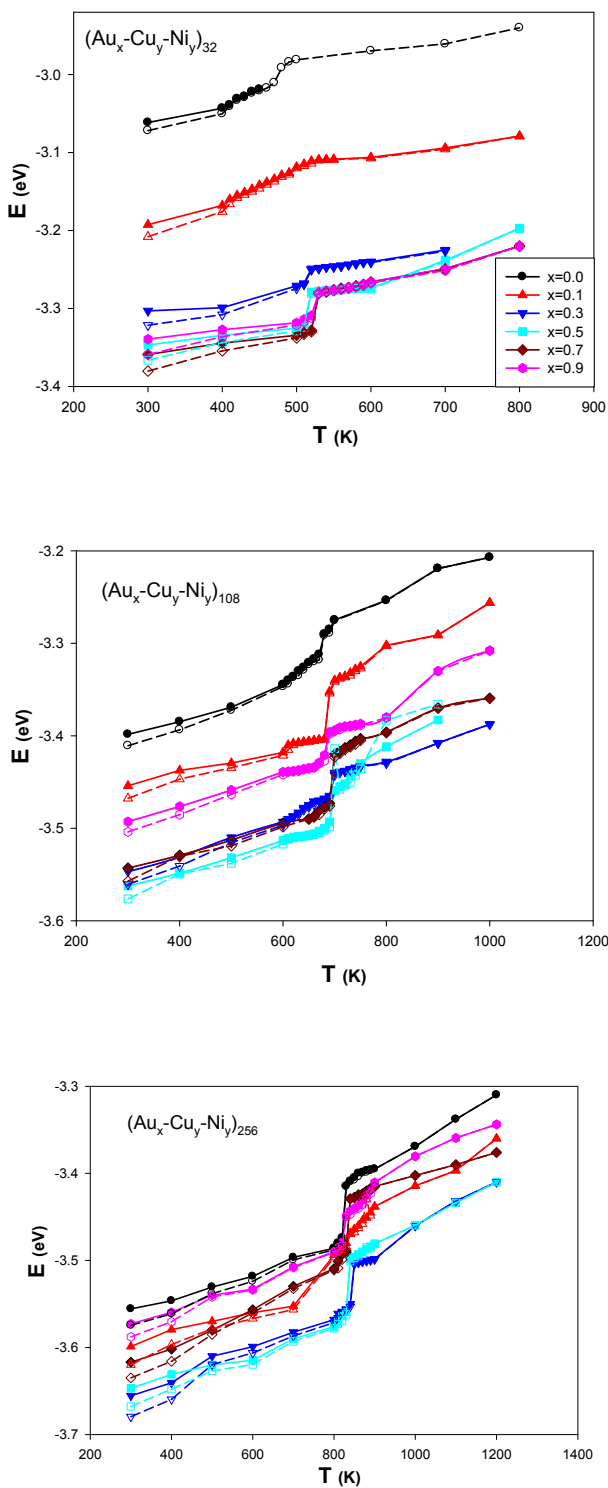

**Fig. S1.** The internal energies for the  $(Au_x-Cu_y-Ni_y)_{N=32,108,256}$  nanoclusters with the different Au mole fractions at different temperatures in the heating and cooling processes.

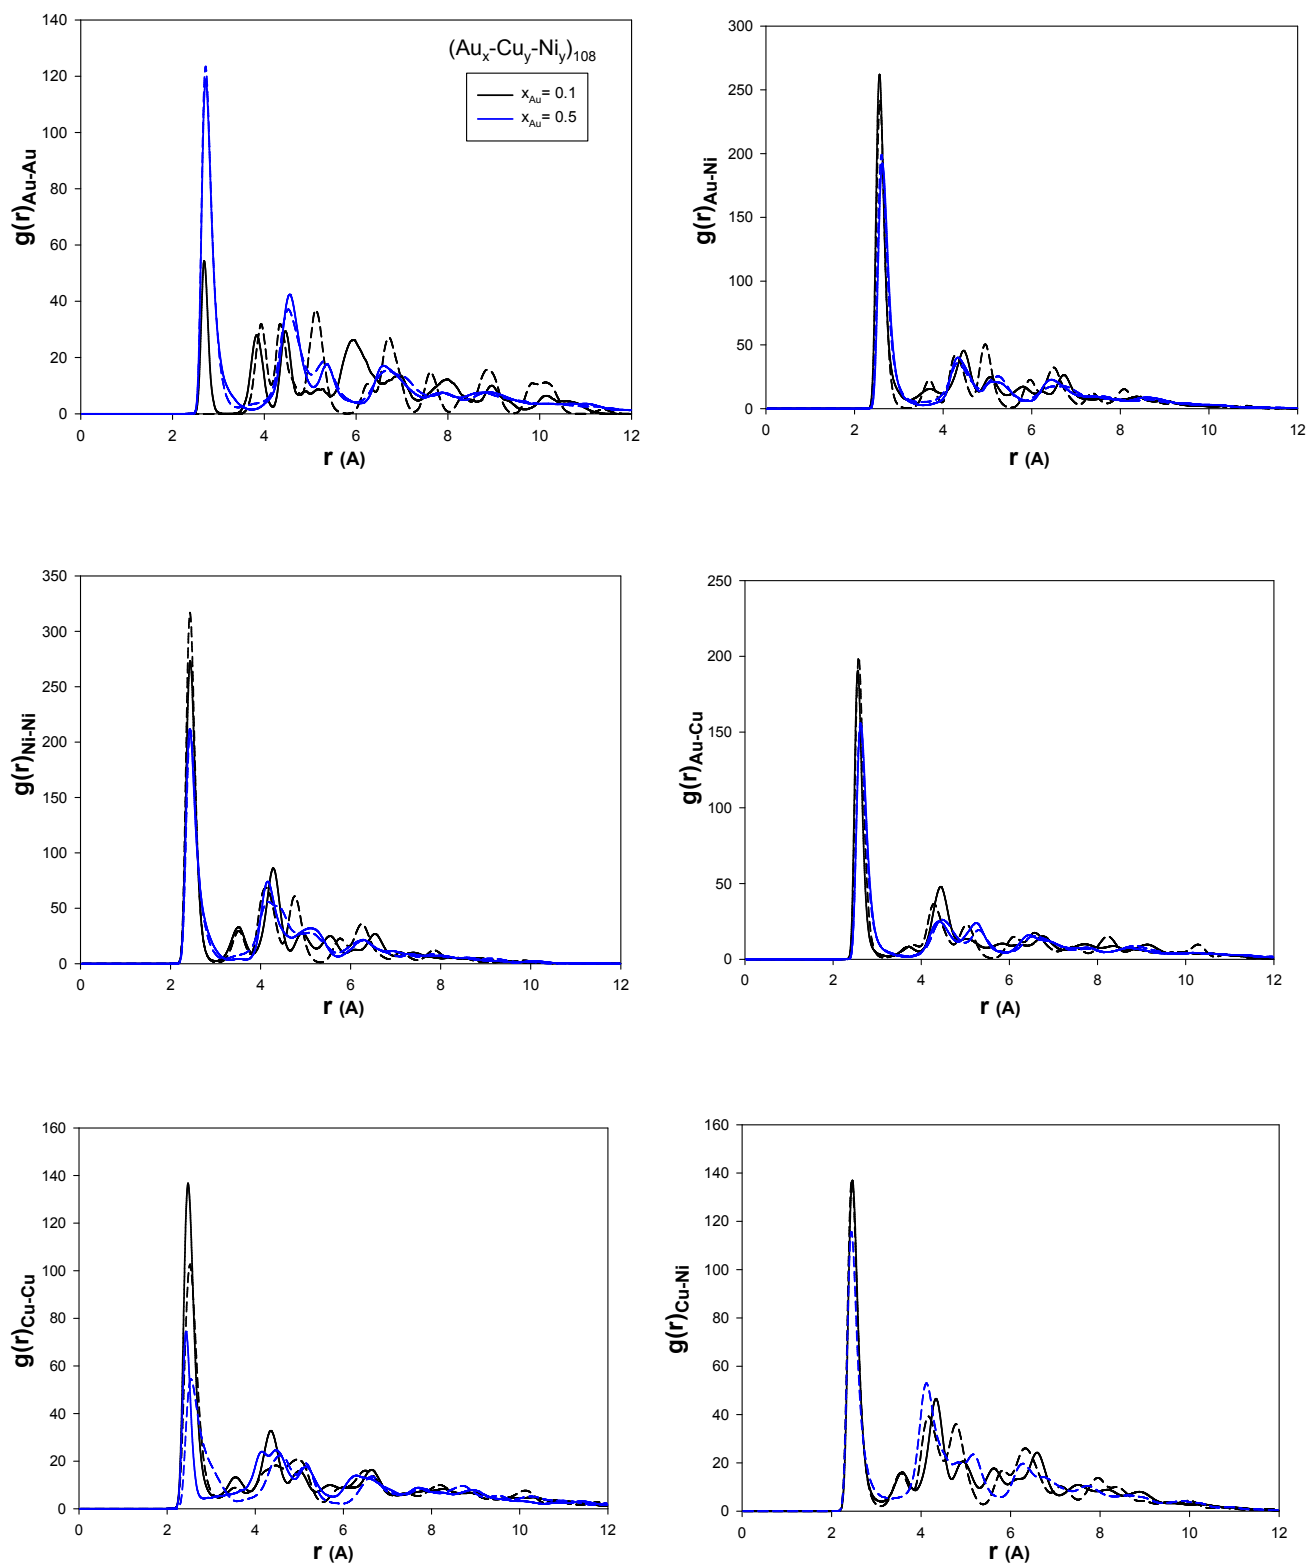

**Fig. S2.** The different RDFs for the  $(\text{Au}_x\text{-Cu}_y\text{-Ni}_y)_{N=108}$  nanocluster at initial at 300 K (the solid lines) and at 300 K after cooling process (the dashed lines) at different Au mole fractions.

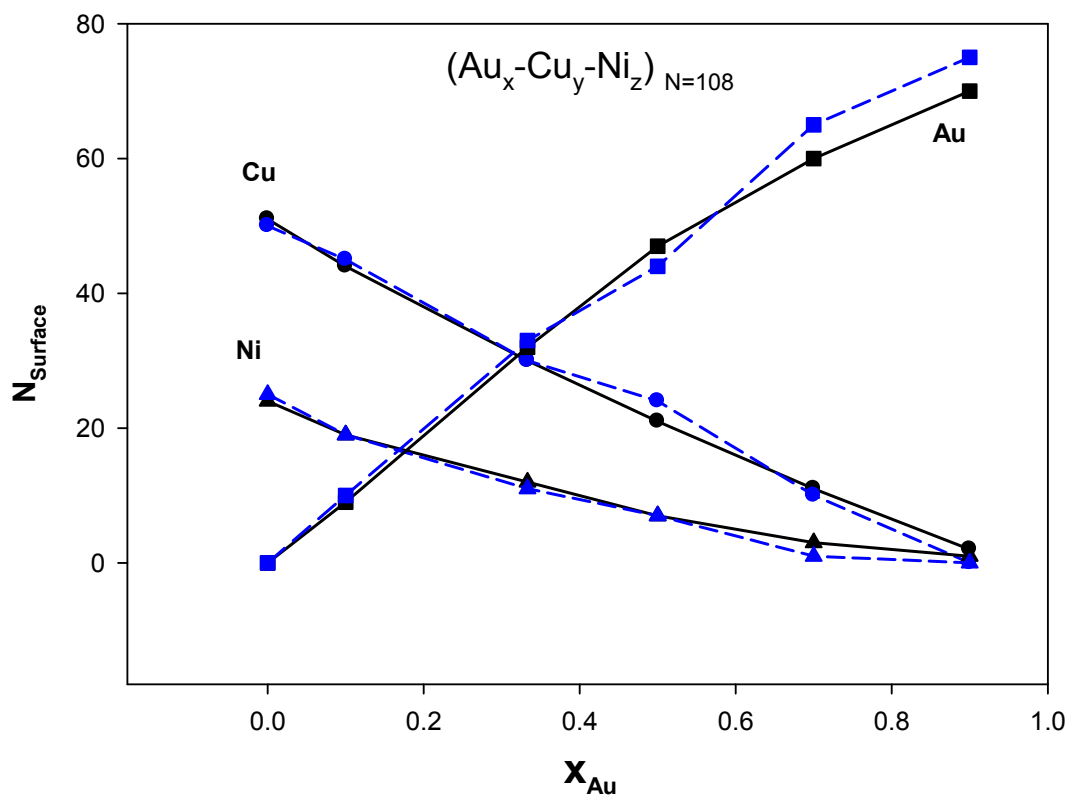

**Fig. S3.** The number of the Au, Ni, and Cu surface atoms in the  $(\text{Au}_x\text{-Cu}_y\text{-Ni}_z)_{N=108}$  nanocluster at the initial at 300 K (the solid lines) and at 300 K after cooling process (the dashed lines) at the different Au mole fractions.

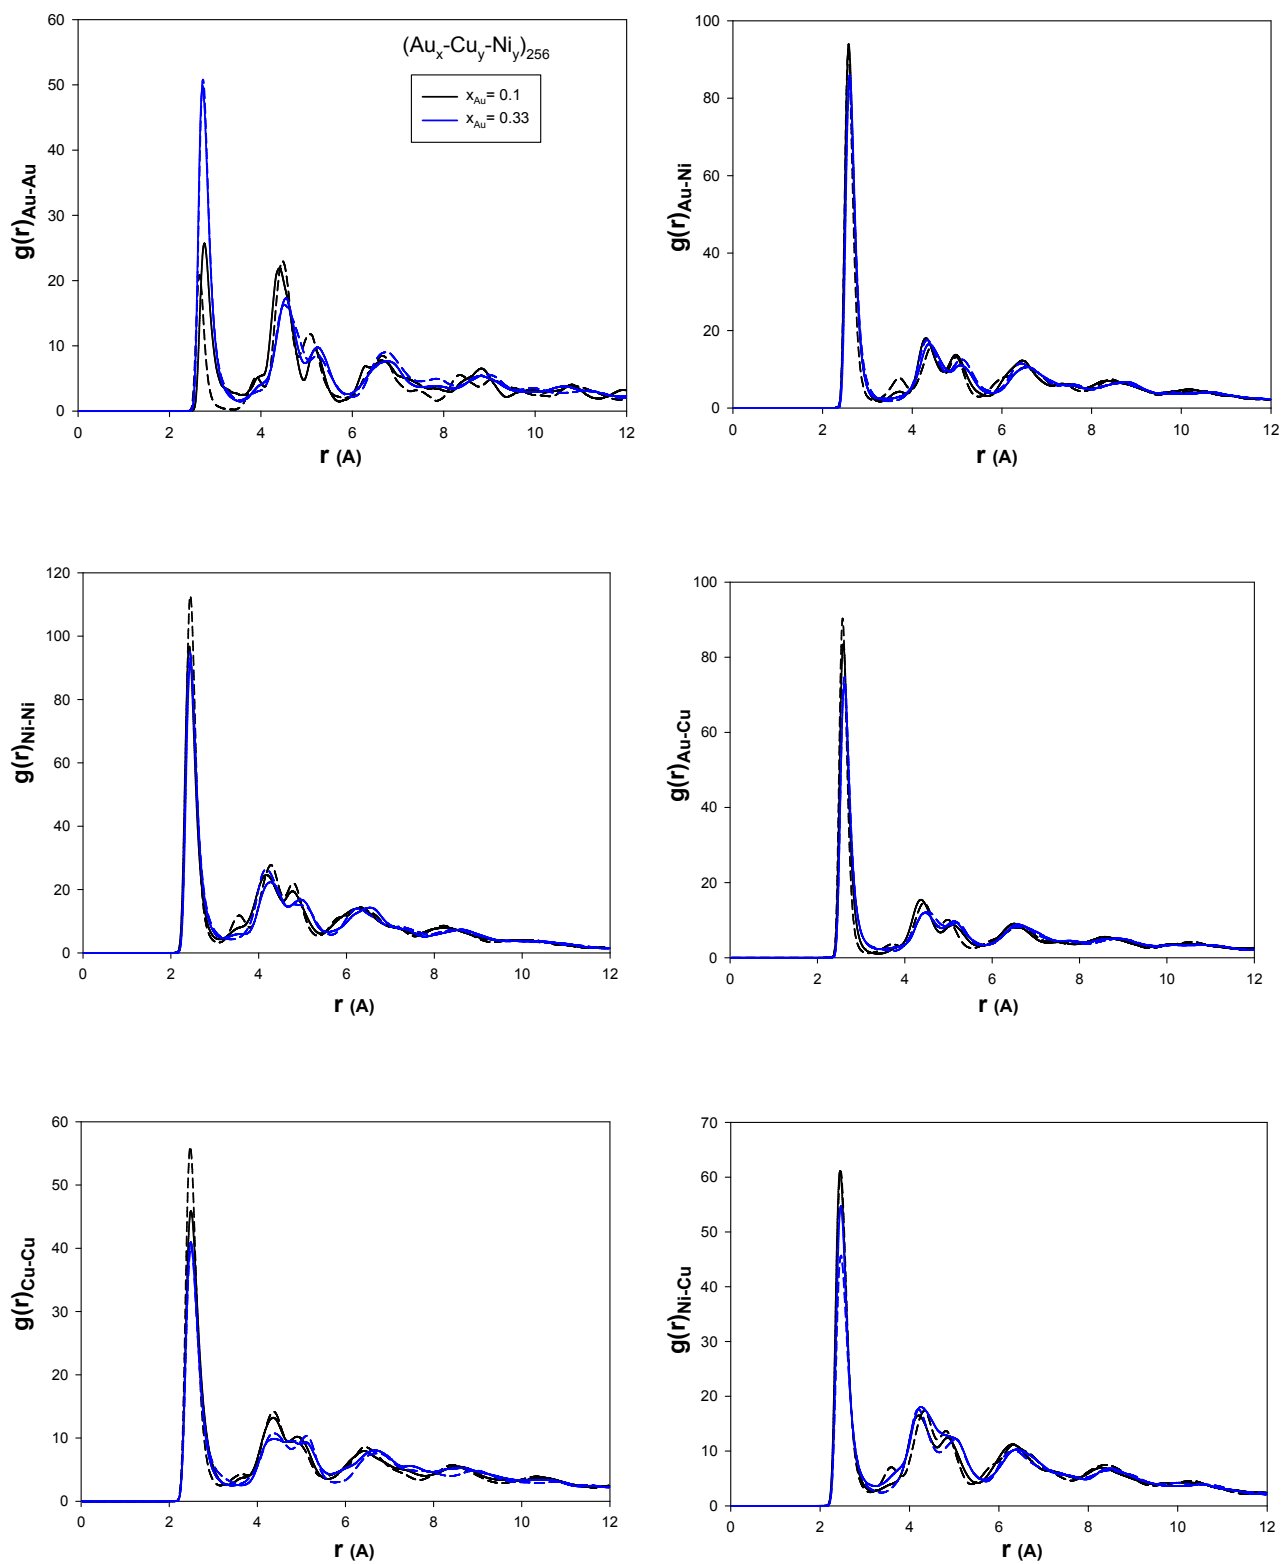

**Fig. S4.** The different RDFs for the  $(\text{Au}_x\text{-Cu}_y\text{-Ni}_y)_{N=256}$  nanocluster at initial at 300 K (the solid lines) and at 300 K after cooling process (the dashed lines) at different Au mole fractions.

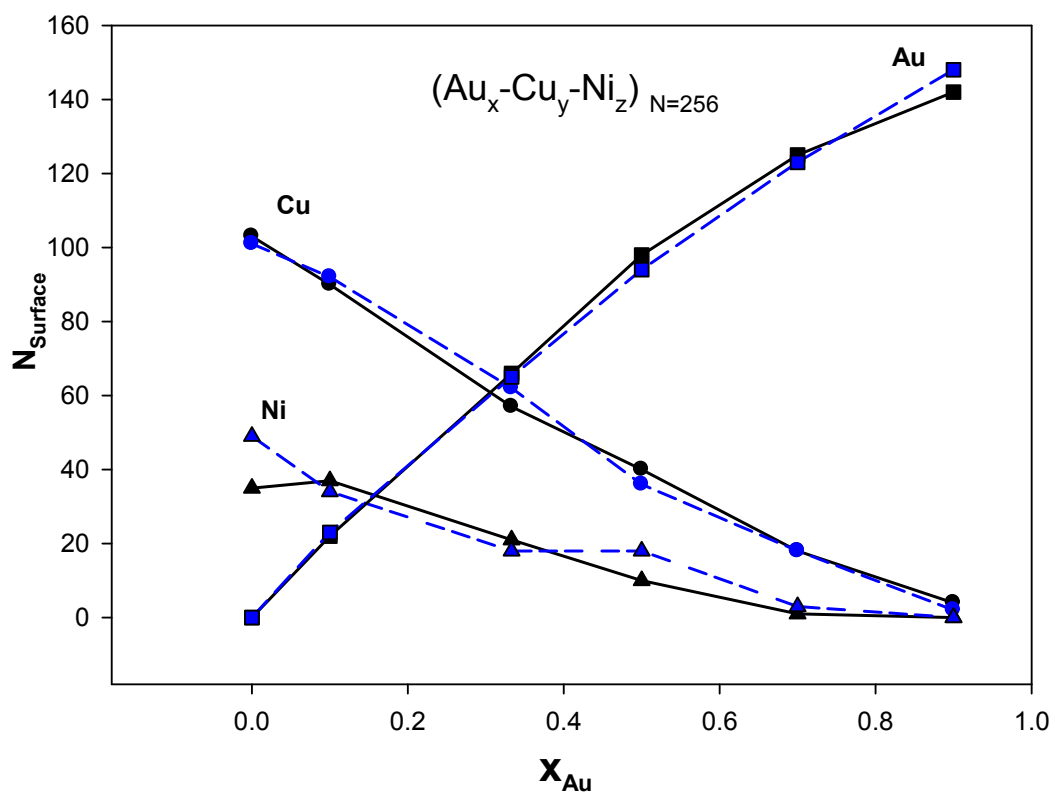

**Fig. S5.** The number of the Au, Ni, and Cu surface atoms in the  $(\text{Au}_x\text{-Cu}_y\text{-Ni}_z)_{N=256}$  nanocluster at the initial at 300 K (the solid lines) and at 300 K after cooling process (the dashed lines) at the different Au mole fractions.
